# Supplementary material for: Pharmacists’ response to anaphylaxis in the community (PRAC): a randomised, simulated patient study of pharmacist practice
Source: HighWire-hosted journal article supplement (doi:10.1136/bmjopen-2014-005648), 2014-07-01
Supplement: bmjopen-2014-005648supp.pdf [file bmjopen-2014-005648supp.pdf]

| PRAC STUDY CODED DATA COLLECTION SHEET |        |        |                                                               |  |  |  |
|----------------------------------------|--------|--------|---------------------------------------------------------------|--|--|--|
| Enter to:                              |        |        |                                                               |  |  |  |
| Column                                 | Code   | ✓      | Description                                                   |  |  |  |
| <b>1. Scenario</b>                     |        |        |                                                               |  |  |  |
|                                        | A      | 1      | Orginal EpiPen                                                |  |  |  |
|                                        | A      | 2      | New-look EpiPen                                               |  |  |  |
|                                        | A      | 3      | Anapen                                                        |  |  |  |
| <b>2. Pharmacy Details: B</b>          |        |        |                                                               |  |  |  |
|                                        | number |        | <b>2.1 Pharmacy Code:</b>                                     |  |  |  |
|                                        |        |        | <b>2.2 Location of Pharmacy:</b>                              |  |  |  |
|                                        | C      | 1      | Street                                                        |  |  |  |
|                                        |        | 2      | Medical Centre                                                |  |  |  |
|                                        |        | 3      | Shopping Centre                                               |  |  |  |
|                                        |        | 4      | Hospital                                                      |  |  |  |
|                                        |        | 5      | Other (state):                                                |  |  |  |
|                                        |        |        | <b>2.3 Type of Pharmacy:</b>                                  |  |  |  |
|                                        | D      | 1      | Independent                                                   |  |  |  |
|                                        |        | 2      | Chain                                                         |  |  |  |
|                                        |        | 3      | Discount/warehouse/megamart                                   |  |  |  |
|                                        |        |        | <b>2.4 Numbers of staff and customers in store (estimate)</b> |  |  |  |
|                                        | E      | number | Staff.....                                                    |  |  |  |
|                                        | F      | number | Customers.....                                                |  |  |  |
|                                        |        |        | <b>2.5 Time of day when the visit was performed</b>           |  |  |  |
|                                        | G      | 1      | 0800-1100                                                     |  |  |  |
|                                        |        | 2      | 1100-1400                                                     |  |  |  |
|                                        |        | 3      | 1400-1800                                                     |  |  |  |
|                                        |        | 4      | After 1800                                                    |  |  |  |
| <b>3. Pharmacist Details</b>           |        |        |                                                               |  |  |  |
|                                        |        |        | <b>3.1 Estimated age (years):</b>                             |  |  |  |
|                                        | H      | 1      | 20-30                                                         |  |  |  |
|                                        |        | 2      | 31-40                                                         |  |  |  |
|                                        |        | 3      | 41-50                                                         |  |  |  |
|                                        |        | 4      | 51-60                                                         |  |  |  |
|                                        |        | 5      | 60+                                                           |  |  |  |
|                                        |        |        |                                                               |  |  |  |

|                              |   |                                                                                                                                                                  |  |  |  |
|------------------------------|---|------------------------------------------------------------------------------------------------------------------------------------------------------------------|--|--|--|
|                              |   | <b>3.2 Gender:</b>                                                                                                                                               |  |  |  |
| <b>I</b>                     | 1 | Male                                                                                                                                                             |  |  |  |
|                              | 2 | Female                                                                                                                                                           |  |  |  |
|                              |   | <b>3.3 Did they suspect a simulated patient?</b>                                                                                                                 |  |  |  |
| <b>J</b>                     | 1 | Yes                                                                                                                                                              |  |  |  |
|                              | 2 | No                                                                                                                                                               |  |  |  |
|                              |   | <b>3.4 Was the pharmacist distracted or interrupted during the consultation?</b>                                                                                 |  |  |  |
| <b>K</b>                     | 1 | Yes                                                                                                                                                              |  |  |  |
|                              | 2 | No                                                                                                                                                               |  |  |  |
|                              |   | <b>3.5 Did the pharmacist ask or tell another counsellor to handle the consultation, BEFORE seeing the patient?</b>                                              |  |  |  |
| <b>L</b>                     | 1 | Yes                                                                                                                                                              |  |  |  |
|                              | 2 | No                                                                                                                                                               |  |  |  |
|                              |   | <b>3.6 Gender of second counsellor:</b>                                                                                                                          |  |  |  |
| <b>M</b>                     | 1 | Male                                                                                                                                                             |  |  |  |
|                              | 2 | Female                                                                                                                                                           |  |  |  |
|                              | 3 | No second counsellor                                                                                                                                             |  |  |  |
|                              |   | <b>3.7 Age of second counsellor (years):</b>                                                                                                                     |  |  |  |
| <b>N</b>                     | 1 | 20-30                                                                                                                                                            |  |  |  |
|                              | 2 | 31-40                                                                                                                                                            |  |  |  |
|                              | 3 | 41-50                                                                                                                                                            |  |  |  |
|                              | 4 | 51-60                                                                                                                                                            |  |  |  |
|                              | 5 | 60+                                                                                                                                                              |  |  |  |
|                              | 6 | No second counsellor                                                                                                                                             |  |  |  |
| <b>4. Allergy Assessment</b> |   | <b>4.1 Did the pharmacist ask: "Do you know what you reacted to?" or "Do you know what caused the allergy/anaphylaxis?" (ie did they identify the allergen?)</b> |  |  |  |
| <b>O</b>                     | 1 | Yes                                                                                                                                                              |  |  |  |
|                              | 2 | No                                                                                                                                                               |  |  |  |
|                              |   | <b>4.2 Did the pharmacist ask: "Do you have any other allergies?"</b>                                                                                            |  |  |  |
| <b>P</b>                     | 1 | Yes                                                                                                                                                              |  |  |  |
|                              | 2 | No                                                                                                                                                               |  |  |  |
|                              |   | <b>4.3 Did the pharmacist ask: "Are you seeing an allergy specialist/having allergy tests"</b>                                                                   |  |  |  |
| <b>Q</b>                     | 1 | Yes                                                                                                                                                              |  |  |  |
|                              | 2 | No                                                                                                                                                               |  |  |  |
|                              |   | <b>4.4 Did the pharmacist ask: Do you have an Action Plan for Anaphylaxis?</b>                                                                                   |  |  |  |
| <b>R</b>                     | 1 | Yes                                                                                                                                                              |  |  |  |
|                              | 2 | No                                                                                                                                                               |  |  |  |

|                                      |   |                                                                                                                                                         |  |  |  |
|--------------------------------------|---|---------------------------------------------------------------------------------------------------------------------------------------------------------|--|--|--|
| <b>5. Autoinjector Demonstration</b> |   |                                                                                                                                                         |  |  |  |
|                                      |   | <b>5.1 Did the pharmacist physically demonstrate the use of the EpiPen/Anapen?</b>                                                                      |  |  |  |
| <b>S</b>                             | 1 | Yes                                                                                                                                                     |  |  |  |
|                                      | 2 | No                                                                                                                                                      |  |  |  |
|                                      |   | <b>5.2 What did the pharmacist use for the physical demonstration?</b>                                                                                  |  |  |  |
| <b>T</b>                             | 1 | Patient's 'live' EpiPen/Anapen                                                                                                                          |  |  |  |
|                                      | 2 | Pharmacist's trainer device                                                                                                                             |  |  |  |
|                                      | 3 | Both the patient's 'live' device and a trainer device                                                                                                   |  |  |  |
|                                      | 4 | No physical demonstration performed                                                                                                                     |  |  |  |
|                                      |   | <b>5.3 Did the pharmacist verbally explain how to use EpiPen/Anapen?</b>                                                                                |  |  |  |
| <b>U</b>                             | 1 | Yes, verbal explanation provided during the physical demonstration                                                                                      |  |  |  |
|                                      | 2 | Yes, provided verbal explanation <b>without</b> physical demonstration                                                                                  |  |  |  |
|                                      | 3 | No verbal explanation provided                                                                                                                          |  |  |  |
|                                      |   | <b>5.4 What did the pharmacist use for the verbal explanation?</b>                                                                                      |  |  |  |
| <b>V</b>                             | 1 | Patient's 'live' EpiPen/Anapen                                                                                                                          |  |  |  |
|                                      | 2 | Written material (Action Plan, CMI)                                                                                                                     |  |  |  |
|                                      | 3 | Verbal counselling without any physical prompts                                                                                                         |  |  |  |
|                                      | 4 | Both patient's 'live' EpiPen/Anapen and written material                                                                                                |  |  |  |
|                                      | 5 | No verbal demonstration performed                                                                                                                       |  |  |  |
|                                      | 6 | Training video shown                                                                                                                                    |  |  |  |
|                                      |   | <b>5.5 Did the pharmacist refer the patient to the instructions on their EpiPen/Anapen?</b>                                                             |  |  |  |
| <b>W</b>                             | 1 | Yes, during the physical demonstration                                                                                                                  |  |  |  |
|                                      | 2 | Yes, during the verbal demonstration                                                                                                                    |  |  |  |
|                                      | 3 | Yes, but without any demonstration                                                                                                                      |  |  |  |
|                                      | 4 | No, not at any stage                                                                                                                                    |  |  |  |
|                                      |   | <b>5.6 Did the pharmacist consult any references, including reading the patient's EpiPen/Anapen, before demonstrating or counselling EpiPen/Anapen?</b> |  |  |  |
| <b>X</b>                             | 1 | Yes                                                                                                                                                     |  |  |  |
|                                      | 2 | No                                                                                                                                                      |  |  |  |
|                                      | 3 | No physical demonstration or verbal counselling performed                                                                                               |  |  |  |
|                                      |   | <b>5.7 Did the pharmacist ask another staff member to <u>demonstrate</u> the Anapen/EpiPen? (AFTER seeing the patient)</b>                              |  |  |  |
| <b>Y</b>                             | 1 | Yes                                                                                                                                                     |  |  |  |
|                                      | 2 | No                                                                                                                                                      |  |  |  |
|                                      |   |                                                                                                                                                         |  |  |  |
|                                      |   |                                                                                                                                                         |  |  |  |

|           |   |                                                                                                                                                          |  |                                                                                       |  |
|-----------|---|----------------------------------------------------------------------------------------------------------------------------------------------------------|--|---------------------------------------------------------------------------------------|--|
|           |   | <b>5.8 If the pharmacist asked another staff member to <u>demonstrate</u> the Anapen/EpiPen, who did they ask?</b>                                       |  |                                                                                       |  |
| <b>Z</b>  | 1 | Second pharmacist                                                                                                                                        |  |                                                                                       |  |
|           | 2 | Pharmacy Intern                                                                                                                                          |  |                                                                                       |  |
|           | 3 | Pharmacy Assistant                                                                                                                                       |  |                                                                                       |  |
|           | 4 | Unsure                                                                                                                                                   |  |                                                                                       |  |
|           | 5 | Did not ask for another staff member to demonstrate                                                                                                      |  |                                                                                       |  |
|           |   | <b>5.9 Did the pharmacist provide any anaphylaxis counselling or information other than device demonstration BEFORE patient asked for antihistamine?</b> |  |                                                                                       |  |
| <b>AA</b> | 1 | Yes                                                                                                                                                      |  |                                                                                       |  |
|           | 2 | No                                                                                                                                                       |  |                                                                                       |  |
|           |   | <b>5.10 If refused, select the reason for demonstration refusal</b>                                                                                      |  |                                                                                       |  |
| <b>AB</b> | 1 | Doctor will show you when you see him/her                                                                                                                |  |                                                                                       |  |
|           | 2 | Pharmacy is too busy now, please come back later                                                                                                         |  |                                                                                       |  |
|           | 3 | Other (state):.....                                                                                                                                      |  |                                                                                       |  |
|           | 4 | No refusal                                                                                                                                               |  |                                                                                       |  |
| <b>AC</b> |   | <b>5.11 If the pharmacist used a device other than the patient's own device in the demonstration, what did they use?</b>                                 |  |                                                                                       |  |
|           | 1 | Original EpiPen trainer                                                                                                                                  |  |                                                                                       |  |
|           | 2 | New-look EpiPen trainer                                                                                                                                  |  |                                                                                       |  |
|           | 3 | Both Original and New look EpiPen trainers                                                                                                               |  |                                                                                       |  |
|           | 4 | Anapen trainer                                                                                                                                           |  |                                                                                       |  |
|           | 5 | Live EpiPen from pharmacy stock (original or new look)                                                                                                   |  |                                                                                       |  |
|           | 6 | Live Anapen from pharmacy stock                                                                                                                          |  |                                                                                       |  |
|           | 7 | No other device used                                                                                                                                     |  |                                                                                       |  |
|           |   | <b>5.12 Device Demonstration: Identify the steps demonstrated</b>                                                                                        |  |                                                                                       |  |
|           |   | Code 0 = Device not assessed, 1=Demonstrated, 2=Not Demonstrated                                                                                         |  |                                                                                       |  |
|           |   | <b>ORIGINAL EPIPEN ONLY</b>                                                                                                                              |  |                                                                                       |  |
| <b>AD</b> |   | 1. Form a fist around Original EpiPen and remove GREY safety cap                                                                                         |  | 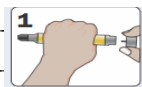 |  |
| <b>AE</b> |   | 2. Place BLACK end against outer mid thigh (with or without clothing)                                                                                    |  |  |  |
| <b>AF</b> |   | 3. Push down HARD until a click is heard or felt and hold in place for 10 seconds                                                                        |  |  |  |
| <b>AG</b> |   | 4. Remove EpiPen and do not touch needle. Massage injection site for 10 seconds                                                                          |  |  |  |

|    |  |                                                                                                           |                                                                                     |  |  |
|----|--|-----------------------------------------------------------------------------------------------------------|-------------------------------------------------------------------------------------|--|--|
|    |  | <b>NEW-LOOK EPIPEN ONLY</b>                                                                               |                                                                                     |  |  |
| AH |  | 1. Form a fist around New-look EpiPen and pull off BLUE safety release                                    |   |  |  |
| AI |  | 2. Place ORANGE end against outer mid thigh (with or without clothing)                                    |  |  |  |
| AJ |  | 3. Push down HARD until a click is heard or felt and hold in place for 10 seconds                         |  |  |  |
| AK |  | 4. Remove EpiPen. Massage injection site for 10 seconds.                                                  |  |  |  |
|    |  | <b>ANAPEN ONLY</b>                                                                                        |                                                                                     |  |  |
| AL |  | 1. Pull off BLACK needle shield                                                                           |  |  |  |
| AM |  | 2. Pull off GREY safety cap from RED button                                                               |  |  |  |
| AN |  | 3. Place needle end firmly against outer mid-thigh (with or without clothing)                             |  |  |  |
| BV |  | 4a. Press RED button so it clicks and hold for 10 seconds.                                                |  |  |  |
| BW |  | 4b. Remove Anapen and do not touch needle.<br>Massage injection site for 10 seconds.                      |  |  |  |
|    |  | <b>5.13 Which of the following errors were made in device demonstration?</b>                              |                                                                                     |  |  |
|    |  | Code 1=Error Made, 2=Error NOT made                                                                       |                                                                                     |  |  |
| AP |  | Incorrect order for removal of black shield and grey cap (Anapen)                                         |                                                                                     |  |  |
| AQ |  | Removal of safety release caps not stated                                                                 |                                                                                     |  |  |
| AR |  | Thumb positioned over the end of EpiPen                                                                   |                                                                                     |  |  |
| AS |  | Thumb not used to inject Anapen (Used EpiPen technique)                                                   |                                                                                     |  |  |
| AT |  | Did not say "Massage injection site for 10 seconds" (or similar)                                          |                                                                                     |  |  |
| AU |  | Wrong site for injection (eg buttock, arm, wrong part of leg)                                             |                                                                                     |  |  |
| AV |  | Incorrect arm technique for EpiPen (wide swinging, 90 degrees)                                            |                                                                                     |  |  |
| AW |  | Did not say "Push down hard until a click is heard" (or similar)                                          |                                                                                     |  |  |
| AX |  | Did not say "Hold for 10 seconds" after injection (or similar)                                            |                                                                                     |  |  |
| AY |  | Did not say "Don't touch needle" (Original EpiPen and Anapen) after removal of EpiPen/Anapen (or similar) |                                                                                     |  |  |
|    |  |                                                                                                           |                                                                                     |  |  |
|    |  |                                                                                                           |                                                                                     |  |  |
|    |  |                                                                                                           |                                                                                     |  |  |

|                                                       |   |                                                                                                                           |  |  |  |
|-------------------------------------------------------|---|---------------------------------------------------------------------------------------------------------------------------|--|--|--|
| <b>6. Additional Anaphylaxis Advice</b>               |   |                                                                                                                           |  |  |  |
|                                                       |   | <b>6.1 Did the pharmacist counsel on signs of anaphylaxis? (any of the signs of anaphylaxis on the ASCIA Action Plan)</b> |  |  |  |
| <b>AZ</b>                                             | 1 | Yes                                                                                                                       |  |  |  |
|                                                       | 2 | No                                                                                                                        |  |  |  |
|                                                       |   | <b>6.2 Did the pharmacist tell the patient to call an ambulance after using Epipen/Anapen?</b>                            |  |  |  |
| <b>BA</b>                                             | 1 | Yes                                                                                                                       |  |  |  |
|                                                       | 2 | No                                                                                                                        |  |  |  |
| <b>BB</b>                                             |   | <b>6.3 Did the pharmacist explain storage conditions? (DO NOT refrigerate, store at 15-25C)</b>                           |  |  |  |
|                                                       | 1 | Yes                                                                                                                       |  |  |  |
|                                                       | 2 | No                                                                                                                        |  |  |  |
| <b>BC</b>                                             |   | <b>6.4 Did the pharmacist explain any of the side effects of adrenaline? (eg tremor, palpitations, headache)</b>          |  |  |  |
|                                                       | 1 | Yes                                                                                                                       |  |  |  |
|                                                       | 2 | No                                                                                                                        |  |  |  |
| <b>BD</b>                                             |   | <b>6.5 Did the pharmacist identify the expiry date of the device?</b>                                                     |  |  |  |
|                                                       | 1 | Yes                                                                                                                       |  |  |  |
|                                                       | 2 | No                                                                                                                        |  |  |  |
| <b>7. Antihistamine Assessment and Recommendation</b> |   |                                                                                                                           |  |  |  |
|                                                       |   | <b>7.1 Did the pharmacist offer a choice of sedating or non sedating antihistamine?</b>                                   |  |  |  |
| <b>BE</b>                                             | 1 | Yes                                                                                                                       |  |  |  |
|                                                       | 2 | No                                                                                                                        |  |  |  |
|                                                       |   | <b>7.2 Did the pharmacist counsel on the use of antihistamines in anaphylaxis?</b>                                        |  |  |  |
| <b>BF</b>                                             | 1 | Yes, counselled in the context of anaphylaxis                                                                             |  |  |  |
|                                                       | 2 | No, counselled in the context of other allergy                                                                            |  |  |  |
|                                                       | 3 | Directed to pack instructions without verbal counselling                                                                  |  |  |  |
|                                                       | 4 | No counselling with the sale of an antihistamine                                                                          |  |  |  |
|                                                       | 5 | No counselling as antihistamine not sold                                                                                  |  |  |  |
|                                                       |   | <b>7.3 Did the pharmacist state the dose of antihistamine?</b>                                                            |  |  |  |
| <b>BG</b>                                             | 1 | Yes                                                                                                                       |  |  |  |
|                                                       | 2 | No                                                                                                                        |  |  |  |
|                                                       | 3 | No antihistamine sold                                                                                                     |  |  |  |
|                                                       |   |                                                                                                                           |  |  |  |

|           |                  |                                                                                                                                                        |  |  |  |
|-----------|------------------|--------------------------------------------------------------------------------------------------------------------------------------------------------|--|--|--|
|           |                  | <b>7.4 Did the pharmacist state when to use the antihistamine: (in the context of mild to moderate allergic reaction that may precede anaphylaxis)</b> |  |  |  |
| <b>BH</b> | 1                | Yes                                                                                                                                                    |  |  |  |
|           | 2                | No                                                                                                                                                     |  |  |  |
|           | 3                | No antihistamine sold                                                                                                                                  |  |  |  |
|           |                  | <b>7.5 Did the pharmacist state: If no improvement after antihistamine, administer adrenaline autoinjector</b>                                         |  |  |  |
| <b>BI</b> | 1                | Yes                                                                                                                                                    |  |  |  |
|           | 2                | No                                                                                                                                                     |  |  |  |
|           | 3                | No antihistamine sold                                                                                                                                  |  |  |  |
|           |                  |                                                                                                                                                        |  |  |  |
|           |                  | <b>7.6 Did the pharmacist sell an antihistamine to the patient?</b>                                                                                    |  |  |  |
| <b>BJ</b> | 1                | Yes                                                                                                                                                    |  |  |  |
|           | 2                | No                                                                                                                                                     |  |  |  |
|           |                  | <b>7.7 Select the reasons stated by the pharmacist for NOT recommending the patient use an antihistamine</b>                                           |  |  |  |
|           | Code 1=Yes, 2=No |                                                                                                                                                        |  |  |  |
| <b>BK</b> |                  | Anaphylaxis occurs too fast for an antihistamine to be of benefit                                                                                      |  |  |  |
| <b>BL</b> |                  | Antihistamines are ineffective in treating anaphylaxis                                                                                                 |  |  |  |
| <b>BM</b> |                  | Other: (state).....                                                                                                                                    |  |  |  |
| <b>BN</b> |                  | No reason given for non recommendation of antihistamine                                                                                                |  |  |  |
| <b>BO</b> |                  | Antihistamine was recommended and sold                                                                                                                 |  |  |  |
|           |                  | <b>7.8 Antihistamine sold: select the product chosen</b>                                                                                               |  |  |  |
| <b>BP</b> | 1                | Dexchlorpheniramine                                                                                                                                    |  |  |  |
|           | 2                | Promethazine                                                                                                                                           |  |  |  |
|           | 3                | Cetirizine                                                                                                                                             |  |  |  |
|           | 4                | Desloratidine                                                                                                                                          |  |  |  |
|           | 5                | Fexofenadine                                                                                                                                           |  |  |  |
|           | 6                | Levocetirizine                                                                                                                                         |  |  |  |
|           | 7                | Loratidine                                                                                                                                             |  |  |  |
|           | 8                | Other (state):                                                                                                                                         |  |  |  |
|           | 9                | No antihistamine sold                                                                                                                                  |  |  |  |
|           |                  |                                                                                                                                                        |  |  |  |
|           |                  | <b>END OF DATA COLLECTION SHEET</b>                                                                                                                    |  |  |  |
